# Supplementary material for: BackUp: Development and evaluation of a smart-phone application for coping with suicidal crises
Source: PLoS One. 2017 Jun 21;12(6):e0178144. doi: 10.1371/journal.pone.0178144 (PMC5479535; doi:10.1371/journal.pone.0178144)
Supplement: S1 Dataset — (XLSX) [file pone.0178144.s001.xlsx]

## Sheet: Expert test
Identification	Did you experience any technical problems while using the app?	Which problems did you experience?	What do you think of the app?	What do you think of the app?: Comments	What do you think of the look and feel of the app?	What do you think of the look and feel of the app?: Comments	What do you think of the name of the app: BackUp?	What do you think of the name of the app: BackUp?: Comments	Do you find the app user-friendly?	Do you find the app user-friendly?: Comments	My first impression of the app	My first impression of the app: Comments	I think the app can help people to deal with suicidal thoughts	I think the app can help people to deal with suicidal thoughts: Comments	Safety Plan: What do you think of the different tools of the app?	My Backups: What do you think of the different tools of the app?	Backup Box: What do you think of the different tools of the app?	Backup Cards: What do you think of the different tools of the app?	Backup Zijn: What do you think of the different tools of the app?	What do you think of the different tools of the app?: Comments	Which part of the app did you find the most useful?	Which part of the app did you find the most useful?: Comments	What does the app lack?	Which part of the app did you find the less useful?	Which part of the app did you find the less useful?: Comments	Comments
E1	No		Good		Somewhat Good	Esthetically fine, but flashy enough for young people?	Good		Definitely		Somewhat positive		agree		Very useful	Very useful	Somewhat useful	Very useful	Very useful		Safety Plan		At a certain moment I came across the word 'skip' when in fact I hade to use that to continue…	Backup Box
E2	No		Good	I think the app is useful, helpful, user friendly, …	Somewhat Good	The app is looking good, professional. Not too crowded, but clear. I do not like the illustrations on the toolbar, but that seems to be rather personal taste.	Good	Very well chosen. The double meaning is nice. Name sounds good, modern, catchy.	Rather	The first two minutes I needed to search how the app worked, but it cleared out soon.	Very positive	Looks very professional	agree	I think it can be supportive at some point, but I think it is merely usefull as a supporting tool in therapy.	Somewhat useful	Somewhat useful	Very useful	No opinion	Somewhat useful	One person will like that module more than the other and vice versa. Personally I think the Box is interesting. Things that will be forgotten otherwise, can be collected and reviewed/relistened to easily. The use of the BackUp Cards and what is expected from me is not that clear to me.	Backup Box	see before	If the Safety Plan is completed, the questions stay at the different parts. At the one hand I think this is good, because than it is easy to adjust, but at the other hand it is not clear that the safetyplan is totally completed. I think it would be handy if after completing there appears a link to 'Your Safety Plan', with a nice overview of the steps to take.	Backup Cards	A list of options to chose from for the different themes seems more clear and easier to fill out. Even as a non-depressed/suicidal person I do not want to fill out a lot of text, let alone someobe with few energy.	There are still some spelling and language errors in the text of the do's and don'ts in Being Backup. If you have not added BackUps, you cannot complete this part of the safetyplan. It would be easy if you can add a BackUp directly in the safetyplan. Now you have to make a detour. You cannot save a quote without adding an 'owner'. I would leave the option open that you do not know whose quote it …
E3	Yes	After completing My BackUps the app crashed and I had to restart it. Besides this no problems. In Being BackUp every page is opened twice.	Good	Good to have a direct link with important others (My BackUps), besides the safety plan and the own BackUp Box.	Good	It looks nice and quiet. It is nice that the user will be able to change the look and feel to his own taste. Only downside are the icons of the safetyplan, they are quite small.	Somewhat Good	It sooths the functionalities of the app. But keep in mind that the name will especially appeal to a younger public. If you also want to appeal to people older than 50, you should look for another name.	Rather	I think it was easy to handle. Only annoying sometimes that you always have to use the menu button to go to another tool. E.g. from the BackUp Box to the safety plan	Very positive	Works smoothly, quiet look&feel, backups!, possibilities to personalize	totally agree	I think the app can ameliorate the problem-solving skills of the user. Next to this it can lower the treshold to contact for example the suicide prevention hotline or a BackUp contact.	Very useful	Very useful	Very useful	Somewhat useful	Very useful	Concering the BackUpCards, I think it would be hard for a lot of users to use them by themselves,	Safety Plan	The safetyplan contains in fact the app: here you can add BackUps, appeal to the BackUp Box, use BackUp cards.	I miss some supportive tools: relaxation excercices, diversion techniques, a diary to monitor suicidal thoughts yourself.	Backup Cards	Because this is somewhat more difficult for users to fill out. People often write little in fields and than it is simplified to items that fit the safety plan.	For a reasonable amount of users it will be difficult to fill out the safetyplan on their own, or it will contain little, e.g. only call to... If you start to read the explanation however, it does mention that you can fill out this plan with a caregiver, ... Could this be shown earlier, so that people do not have to look for it further. Just in case people do not drop out when they think it is di…
E4	No		Good		Good		Somewhat Good	The icon (always at the left top of the menu bar) is confusing however, I sometimes have the tendency to click on it…	Rather	It contains very much information and things to do for an app. It took me a while to understand everything… you have to persist for a while.	Somewhat positive		agree		Very useful	Somewhat useful	Somewhat useful	Somewhat niet useful	Geen mening	I do not know how Being BackUp has a place in this app, different target audience? The BackUp Cards seem quite devious/complicated…	Safety Plan		/	Backup Cards		The pictures in the BackUp Box turn from vertical to horizontal automatically and are not well positioned that way.
E5	No		Neutral	My biggest concern is what the added value of the app is in relation with On track Again. What is your unique selling point?	Neutral	I do not dislike the look and feel. It is consistent. When I compare it to On Track Again, I think this one is much better!	Somewhat Good	I think the name is rather well chosen, nice. Did you think of the searchability in the app store/on the internet? When I enter BackUp in the app store, I find many other apps.	Rather	When I start the app I immediately enter the safety plan screen and not the opening screen with the six icons...	Neutral		agree		Somewhat useful	Somewhat useful	Somewhat useful	Somewhat useful	Very useful	Can you link My BackUps to contacts in your contact list? Can I admit certain people to participate in the app together? I notice that there is no online diary included. Would this be an added value? Especially when it would be shareble with for example a therapist.	Being Backup	I think Being BackUp is the most innovative part of the app. It would be a great added value if this would be (even more) an app for both the persons themselves, as their context, as the therapist.	I question if the look and feel is appealing to youngsters. The possibility to work with the context - share things. What is the difference and added value to On Track Again.	Safety Plan
E6	Yes	After downloading the app I got to see the four opening screens of the different tools, but I could not click on them - only swipe between the screens. This was solved after restarting the app. The explanations mentioned at for example the hotlines are very relevant, but too small to read.	Good	The app combines different tools and approaches. Powerful.	Somewhat Good	The cleanness and soberness is for this kind of tool very OK. I do not even think that personalizable background settings are necessary ... the emphasis lies rigthly so on personalizing the content of the contacts, safety plan, BackUp Cards, …	Good	When I think about it ... wonderful name. But the first connotation still is: breakdown, spare part, when it really goes wrong... often this is the case however ... but if you could strengthen the Up in the lay-out, the tool will have a more postive look.	Rather	Especially because of the simplicity. The tool is very user friendly and certainly not complex. It is a very language based tool however ... especially the safety plan.	Somewhat positive		agree		Somewhat useful	Very useful	Very useful	Somewhat useful	Very useful	When adding contacts I do not know if the distinction between 'contact' and 'caregiver' is relevan. Use perhaps 'acquaintance' instead of 'contact'. When I contact a BackUp through a pre-set sms, the BackUp app throws me out... that has not to be the case I think. I have to add an author to the quotes in the BackUp Box or it will not save... I would make this facultative. 'Coping' in the safety p…	My Backups		The possibility to hide tools that I do not use.	Being Backup	Being BackUp is a very useful part BUT in fact I think that with this tool you focus on two target audiences OR on two very different moments in which people use the tool. SUGGESTION IS: Add an opening screen with two choices: 'I need a BackUp' and 'I want to be a BackUp'.	I repeat my most important remark: The tools safetyplan + My BackUps + BackUp Box + BackUp cards belong together. Being BackUp stands aside. In fact you target with this app two different audiences OR twe different moments/situations in which somebody will use the app. Make because of that an opening screen with two choices: 'I need a BackUp' and 'I want to be a BackUp'. Lots of succes with furth…
E7	No		Good		Somewhat Good		Somewhat Good		Rather		Somewhat positive		agree		Very useful	Very useful	Very useful	Somewhat useful	Somewhat useful		Safety Plan		Maybe a 'fast button' for immediate help in the overview menu of BackUp.	Backup Cards	Every part has its pupose, so I do not have the feeling that there is something that is not useful.
E8	No		Good		Good		Good		Definitely		Very positive		agree		Very useful	Very useful	Very useful	Somewhat useful	Very useful	It will probably be my mistake ;-) but with the BackUp Cards I do not understand very well the combination of the explanation for this module (help to recognize difficult situations) and the different themes (sportive, expressive, mindfull, ...). The themes are probably linked to actions that you kan do? This would better be explained more extensive for the user. Better explain the theme 'mindful…	Safety Plan		Maybe still some more elaborated explanation at the opening screen of the different modules? Or perhaps work with examples of other persons who completed the module? Just to be sure that the app and the different modules are as clear as possible for every user.	Backup Cards	Only because I miss some more specific explanation. Otherwise this module is absolutely useful as well.	Nice result! Well done!
