# Supplementary material for: BackUp: Development and evaluation of a smart-phone application for coping with suicidal crises
Source: PLoS One. 2017 Jun 21;12(6):e0178144. doi: 10.1371/journal.pone.0178144 (PMC5479535; doi:10.1371/journal.pone.0178144)
Supplement: S2 Dataset — (XLSX) [file pone.0178144.s002.xlsx]

## Sheet: End user test
ID	Age	Gender	Type of smartphone	Operating system	Informed consent	BSS pretest 1	BSS pretest 2	BSS pretest 3	BSS pretest 4	BSS pretest 5	BSS pretest 6	BSS pretest 7	BSS pretest 8	BSS pretest 9	BSS pretest 10	BSS pretest 11	BSS pretest 12	BSS pretest 13	BSS pretest 14	BSS pretest 15	BSS pretest 16	BSS pretest 17	BSS pretest 18	BSS pretest 19	BSS pretest 20	BSS pretest 21	BSS pretest Total	How many times did you use the app?	What do you think of the app?	What do you think of the look and feel of the app?	What do you think of the name of the app: BackUp?	Do you find the app user-friendly?	My first impression of the app	I feel that the app helped me to deal with my suicidal thoughts	Safety Plan: What do you think of the different tools of the app?	My Backups: What do you think of the different tools of the app?	Backup Box: What do you think of the different tools of the app?	Backup Cards: What do you think of the different tools of the app?	Being BackUp: What do you think of the different tools of the app?	Which part of the app did you find the most useful?	Which part of the app did you find the most useful?: Comments	What does the app lack?	Which part of the app did you find the less useful?	Which part of the app did you find the less useful?: Comments	Would you use the app in your daily life?	Did you contact a care-giver because of your suicidal thoughts in the last week?	Comments	BSS posttest 1	BSS posttest 2
ID_1	48	Male	Samsung	Android	I declare I have read the information about this research and that I want to participate	0	2	1	2	1	1	1	0	1	1	2	1	0	1	0	0	2	2	0	2	1	21	several times	good	rather good	good	very much	rather positive	I totally agree	very useful	rather useful	rather useful	rather useful	very useful	My Backups	Very handy to be able to add contactsn especially with the sms formulated in advance	I didn't miss a lot, but it is rather confronting to fill it out. Maybe add a warning to do this when feeling fine?	Backup Cards	A lot of work to use. I don't have much pictures in my phone. It would be nice if I could do this on my laptop...	Certainly	No	Often I try to be self-sufficient. Only when this doesn't work, I search help, first from my own social network. And by making sure a lot of things are not available I help myself not to act impulsively	0	1
ID_2	18	Female	Iphone 5C	iOS	I declare I have read the information about this research and that I want to participate	1	1	0	1	1	1	1	0	0	0	2	0	1	0	0	0	1	0	1	2	1	14	several times	good	good	good	very much	very positive	I agree	rather useful	very useful	very useful	very useful	no opinion	Backup Cards	You really think about the things that can help you, if you can't think of these things in crisis, you can look back at what you put in the app	Witnesses telling about how they coped with difficult periods.	Safety Plan	Because this is just repitition of the rest of the content of the app	Certainly	No	Very good app	1	1
ID_3	26	Female	iPhone 6	iOS	I declare I have read the information about this research and that I want to participate	2	0	1	1	1	1	0	1	0	1	2	2	2	1	0	0	0	0	1	0	0	16	once	bad	bad	rather bad	not at all	rather negative	I don't agree	rather not useful	totally not useful	no opinion	rather not useful	rather useful	Being BackUp	The BackUpBox is very low threshold. Being BackUp consists of a lot of useful information	Tips & tricks, checklists, "gratitude list" in which you can add something when something makes you feel better, something you are grateful for, something that went well	My BackUps	My backups is rather useless. Backup cards/safety plan seem quite similar and are hard to use. Often I cannot link my bad feeling to a situation, and I don't kow at all what I can do about it.	Rather not	No		2	0
ID_4	27	Female	Oneplus one	Android	I declare I have read the information about this research and that I want to participate	0	2	0	1	1	1	1	0	0	0	2	1	1	1	1	1	1	1	1	1	2	19	several times	rather good	rather good	rather good	in between	in between	in between	rather useful	very useful	very useful	very useful	no opinion	Backup Cards	BackUp asks - at first sight - a lot of the user, in stead of offering concrete things. In the beginning, this can be confusing. It should be advised to open the app and explore it for the first time when you feel fine and at ease. When this is the case, especially the backup cards are very handy for recognizing your feelings and offering solution (which you have to search for yourself, maybe som…	Solution or tips. maybe I didn't check it all and I missed it, but I have the feeling that when someone strongly thinks about suicide and downloads the app in a difficult moment, this person will not be helped. Filling out the cards and boxes and contacts asks for a (temporary) positive attitude which is not always there.	Backup Zijn	Personally this has been the least useful for me. It is meant for the people you allow as backup, I suppose. For them, this is essential of course. The link didn't work, my backups could not download the app, so I don't know how the app will look for them. Maybe it would be most useful to create 2 apps (if possible). one for the suicidal people and one for the backups in which recognition of sign…	rather yes	No		0	1
ID_5	21	Female	Iphone 5s	iOS	I declare I have read the information about this research and that I want to participate	1	2	2	2	1	2	1	2	1	1	2	1	2	1	2	0	2	0	1	1	2	29	daily	rather good	good	neutal	very much	rather positive	I agree	very useful	no opinion	rather useful	rather useful	rather useful	Safety Plan	Always at hand	Nothing	Backup Cards		rather yes	No		1	2
ID_6	32	Male	iPhone 5	iOS	I declare I have read the information about this research and that I want to participate	0	1	1	0	0															0	0	2
ID_7	18	Female	Apple	iOS	I declare I have read the information about this research and that I want to participate	2	2	2	2	2	2	2	2	2	2	2	2	2	2	2	1	0	0	2	1	2	36
ID_8	21	Female	Motorola 4G	Android	I declare I have read the information about this research and that I want to participate	1	2	2	2	1	2	2	1	0	2	2	2	2	1	2	2	2	1	1	2	1	33	several times	not good - not bad	not good - not bad	good	rather much	in between	I don't agree	very useful	rather useful	rather useful	rather useful	rather useful	Being BackUp	Is most explained	More choices that are suggested at forehand	Backup Box		Certainly not	Yes		1	2
ID_9	29	Female	Samsung s3 mini	Android	I declare I have read the information about this research and that I want to participate	0	1	0	0	0															0	2	3
ID_10	37	Female	Ipad 2	iOS	I declare I have read the information about this research and that I want to participate	0	1	0	1	0	0	0	0	1	1	2	1	2	1	1	1	1	1	2	2	2	20
ID_11	26	Female	iphone 4	iOS	I declare I have read the information about this research and that I want to participate	0	1	0	0	1	0	0	1	0	0	2	0	2	1	1	0	0	0	2	1	2	14
ID_12	26	Female	Iphone	iOS	I declare I have read the information about this research and that I want to participate	1	1	0	1	1	1	1	2	0	0	1	1	2	1	1	1	1	1	0	1	2	20
ID_13	20	Female	Samsung galaxie s5 mini	Android	I declare I have read the information about this research and that I want to participate	2	2	1	2	1	2	1	2	1	1	2	2	1	1	2	2	2	2	2	2	2	35	daily	rather good	not good - not bad	good	very much	rather positive	I agree	rather useful	very useful	no opinion	rather useful	no opinion	Safety Plan	The safety plan and the back-up card because they show what you can fight for.	no idea	Backup Cards	Because I would never dare to call someone	rather yes	Ja	None	1	1
ID_14	30	Female	samsung s3 mini	Android	I declare I have read the information about this research and that I want to participate	0	1	0	1	1	0	1	1	0	1	2	0	2	0	0	0	0	1	0	1	1	13
ID_15	19	Female	Samsung galaxy note 4	Android	I declare I have read the information about this research and that I want to participate	1	2	2	2	2	2	2	1	1	2	2	1	2	2	1	0	2	0	2	2	2	33	several times	good	rather good	rather good	very much	very positive	I totally agree	very useful	very useful	very useful	very useful	no opinion	Safety Plan	I used the safety plan the most because I can look at it very often and it helps me to get myself in control	some kind of diary	Being BackUp	Being BackUp was least useful for me beacuse the app was meant to deal with my suicidal thoughts and it is hard to help someone else when feeling suicidal yourself.	Certainly	No	I did go to my psychologist and I told her about the app, and she found it worth trying it...	2	2
ID_16	20	Female	iPhone 5s	iOS	I declare I have read the information about this research and that I want to participate	1	2	2	1	2	1	1	2	1	2	2	2	1	2	1	1	2	2	2	2	2	34
ID_17	32	Male	samsung s5	Android	I declare I have read the information about this research and that I want to participate	1	2	1	0	1	1	0	1	0	0	2	0	0	0	1	0	0	0	2	0	0	12
ID_18	41	Male	apple. iphone 5	iOS	I declare I have read the information about this research and that I want to participate	0	0	0	0	1	0	0	1	0	1	2	0	0	1	0	0	0	0	1	0	0	7	several times	rather good	good	rather bad	very much	rather positive	in between	no opinion	very useful	very useful	rather useful	no opinion	My Backups	Most functional for this kind of app	hot line red button-kind of thing… just push and automatically a message is sent to backup nr1	Safety Plan	I think this is a nice thing, but does it really help in crisis?	No opinion	No	Very nice app, nice design, good functionality, but in case of… I don't think I would use an app	0	0
ID_19	27	Female	samsung galaxy s3 mini	Android	I declare I have read the information about this research and that I want to participate	0	1	0	1	1	0	0	0	0	0	2	0	0	0	0	0	0	0	0	1	2	8	daily	good	good	good	very much	very positive	I agree	very useful	very useful	very useful	very useful	very useful	Safety Plan	I really like the name, much better than safetyplan :-) An idea: a list of suggestions you can select, symptoms, coping, ... those would give inspiration to try things out and to help to see what is really working.	A list of suggestions for the backupcards, the safetyplan. The app asks some kind of selfknowledge to deal with crisis, and not everyone has that kind of knowledge. Crisis skills would be very welcome here. It also asks a lot of effort the type everything yourself, so a list of choices would be very useful. To be able to upload an own background would be nice as well.	Backup Cards	I find everything very useful. BackUpcards should be expanded to make it easier to use them. Situations, feelings (which I find really hard to call) so a list with feelings could help me, and also what I can do to deal with them: here also a list with possibilities and skills would be very welcome. Being backup is also very good to be able to communicate with my friends when in crisis, also good …	Certainly	Yes	Thank you very much for developing this app, to let me test it and to improve it. I had a lot of support of it during the last week.	0	1
ID_20	24	Female	Apple iPhone 5S	iOS	I declare I have read the information about this research and that I want to participate	1	1	2	1	1	2	1	2	0	1	2	2	2	1	1	1	1	2	0	2	1	27	daily	rather good	good	rather bad	rather much	rather positive	in between	rather useful	rather useful	rather useful	rather useful	no opinion	Safety Plan	I experience the safety plan as the most effective part, because in very difficult moments I find it really hard to think clearly. This function makes it easier to recognize signals and helps to take steps.	Ideas or suggestions of other people. E.g. what other people do or what helps them to distract or to get rid of those annoying feelings. Anounymous of course.	My BackUps	These backup contacts are already in my phone, so this function doesn't really add anything for me. But it can possibly help people to get an overview who to call when you have a lot of contacts, or multiple care givers and instances to deal with	Rather yes	No		1	2
ID_21	21	Female	iPhone 5s	iOS	I declare I have read the information about this research and that I want to participate	1	1	1	1	2	1	1	1	1	1	1	1	2	1	1	2	1	0	1	2	2	25	several times	good	good	good	rather much	rather positive	I agree	very useful	no opinion	very useful	rather useful	rather useful	Backup Box	Nice you can look at good moments! They stay with me this way. They make me smile.	That you can make your own theme. That we be nice and more personnal.	My BackUps	Doesn't do much to me	Certainly	No	Only that it would be nice and more personnal if you could add your own theme	1	1
ID_22	36	Female	iPad Air	iOS	I declare I have read the information about this research and that I want to participate	0	1	1	1	0	1	1	1	1	1	2	0	2	1	1	0	0	1	0	0	0	15	several times	rather good	not good - not bad	rather bad	rather much	rather positive	in between	rather useful	rather useful	rather useful	no opinion	rather useful	Backup Box	In this function you can add a lot of personal things, that can help you when you are not feeling fine. If it would really help when in crisis, I doubt.	I miss some kind of diary, to express feelings. Or a mood-barometer	Backup Zijn		Rather yes	No	When I am really in crisis, calling a professional is for me a too high threshold I have to deal with. Maybe the app can be of significance here.	0	1
ID_23	26	Female	Apple iPhone 6	iOS	I declare I have read the information about this research and that I want to participate	2	2	2	1	1	1	1	1	0	1	2	1	1	0	1	0	0	0	1	1	2	21	several times	rather good	good	rather bad	very much	rather positive	I totally don't agree	rather useful	very useful	rather useful	rather useful	very useful	My Backups	I think this is a good app for people struggling with suicidal thoughts, but I don't see it as a tool for myself	I have no idea how this kind of app could become useful for me	Backup Cards	Can be helpful for other people but not for me	rather not	yes		2	2
ID_24	54	Female	samsung	Android	I declare I have read the information about this research and that I want to participate	0	1	1	1	1	1	1	1	0	1	2	1	2	1	1	0	0	1	0	0	0	16	several times	good	rather good	good	very much	rather positive	in between	rather useful	rather useful	rather useful	rather useful	rather useful	Safety Plan		Nothing	Backup Box	Didn't work	Rather yes	No		0	1
ID_25	42	Female	i-phone 4s	iOS	I declare I have read the information about this research and that I want to participate	1	0	1	1	0	0	0	1	0	1	2	0	0	1	0	0	0	1	0	0	0	9	never	not good - not bad	not good - not bad	not good - not bad	in between	rather positive	in between	no opinion	no opinion	no opinion	no opinion	no opinion	Safety Plan	I didn't download or use the app. My apologies.		Being BackUp	No idea	No opinion	Yes	For the moment I have chat conversations with the therapist of the helpline
ID_26	22	Female	Samsung galaxy core prime	Android	I declare I have read the information about this research and that I want to participate	1	1	1	1	1	1	1	1	1	1	2	1	2	1	1	0	1	0	2	0	0	20
ID_27	18	Male	huawei	Android	I declare I have read the information about this research and that I want to participate	1	1	1	1	2	1	1	1	1	1	1	1	1	1	1	0	0	0	2	0	1	19
ID_28	18	Male	IPhone 6	iOS	I declare I have read the information about this research and that I want to participate	1	1	2	1	1	2	2	1	1	2	2	1	2	1	1	0	1	0	2	0	0	24	several times	rather good	good	not good - not bad	rather much	very positive	in between	rather useful	rather useful	rather useful	rather useful	rather useful	Backup Cards		Advice how to deal with automutilation, because this is how the suicidal process often starts	My BackUps	Not bad at all! Just the least gooed	Certainly	No	Easy to use, very simple. There should only be more about automutilation and bad thoughts in your head. I miss that.	1	1
ID_29	22	Male	Nexus 5 (nieuwste Android-versie)	Android	I declare I have read the information about this research and that I want to participate	1	1	1	1	1	0	0	1	0	1	1	0	1	1	0	1	0	1	1	2	2	17	once	good	good	good	rather much	very positive	in between	very useful	rather useful	rather useful	rather useful	rather not useful	Safety Plan		More details for people who want to help someone else	Being BackUp		Rather yes	No		1	1
ID_30	26	Female	samsung note 3	Android	I declare I have read the information about this research and that I want to participate	1	2	2	1	1	1	1	2	1	1	2	1	0	1	1	1	2	0	1	0	1	23
ID_31	21	Female	Nexus 5(google phone)	Android	I declare I have read the information about this research and that I want to participate	0	2	1	1	1	1	1	2	2	2	2	2	2	2	2	0	0	0	2	2	2	29
ID_32	30	Female	iPhone 5s	iOS	I declare I have read the information about this research and that I want to participate	1	1	1	1	1	0	1	0	0	1	0	0	1	0	0	0	0	2	1	0	0	11
ID_33	26	Female	Samsung galaxi s5 mini	Android	I declare I have read the information about this research and that I want to participate	1	1	2	1	1	1	1	1	0	1	2	1	2	1	0	0	1	1	2	2	2	24
ID_34	32	Female	Lexus 5	Android	I declare I have read the information about this research and that I want to participate	0	1	0	0	0															0	0	1	once	not good - not bad	good	rather bad	rather much	rather positive	I agree	no opinion	no opinion	very useful	no opinion	rather useful	Backup Box	I am sorry I couldn't test the app in a good way, I find it really hard to motivate myself. I really liked the backupbox because it is easy to add content	the name reminds me of storing things, making a backup	Backup Cards	I asks to much of me to recognise difficult situations and to write them down. Maybe it there were suggestions? Social situations, fights, etc. so I could add my own thoughts?	Rather not	No	keep up the good work	0	1
ID_35	47	Male	iPad en iphone	iOS	I declare I have read the information about this research and that I want to participate	1	2	2	2	2	1	1	2	1	2	1	2	2	1	2	1	1	1	1	0	0	28	several times	rather bad	rather good	not good - not bad	rather not	rather negative	I don't agree	no opinion	totally not useful	totally not useful	rather not useful	no opinion	Safety Plan	.	Suggestions how to become quiet, to change your mind	My BackUps	I don't have anyone	No opinion	Yes	Maybe still adapt a little bit. There certainly is a need for an app like this. The chat is not enough available. Good luck	1	1
ID_36	44	Female	samsung	Android	I declare I have read the information about this research and that I want to participate	0	0	0	1	0	1	0	0	0	0	2	0	0	1	0	0	0	0	2	0	0	7
ID_37	40	Male	IPhone 6	iOS	I declare I have read the information about this research and that I want to participate	0	0	0	0	1	1	0	1	0	1	1	0	0	1	1	0	0	0	0	1	2	10
ID_38	29	Female	Sony experia z1	Android	I declare I have read the information about this research and that I want to participate	1	1	1	1	0	2	1	1	0	1	2	1	2	1	1	0	0	0	2	2	1	21	never	not good - not bad	not good - not bad	not good - not bad	in between	in between	I agree	no opinion	no opinion	no opinion	no opinion	no opinion	Safety Plan	I didn't use it	I didn't use it	Being BackUp	I didn't use the app	No opinion	yes		1	1
ID_39	40	Male	sony xperia Z	Android	I declare I have read the information about this research and that I want to participate	1	1	1	2	0	1	1	0	1	1	0	1	1	0	0	0	0	0	0	0	0	11
ID_40	18	Female	Samsung Galaxy S5	Android	I declare I have read the information about this research and that I want to participate	1	1	1	0	1	0	0	1	0	2	1	1	0	0	0	1	2	0	0	2	0	14
ID_41	18	Female	I phone	iOS	I declare I have read the information about this research and that I want to participate	1	1	1	1	1	1	1	1	1	0	1	1	1	1	1	0	1	0	1	2	0	18
ID_42	35	Female	Samsung s5	Android	I declare I have read the information about this research and that I want to participate	1	1	2	1	1	0	1	1	0	1	2	0	0	1	1	0	0	1	0	0	0	14
ID_43	18	Male	samsung galaxy s4 mini	Android	I declare I have read the information about this research and that I want to participate	1	2	2	2	1	1	2	1	1	2	2	1	1	2	1	1	0	0	2	2	2	29
ID_44	36	Male	SAMSUNG GALAXY	Android	I declare I have read the information about this research and that I want to participate	1	1	1	1	1	1	1	1	1	1	2	0	1	0	1	0	0	0	0	2	1	17
ID_45	43	Female	I phone 4s	iOS	I declare I have read the information about this research and that I want to participate	1	2	2	1	1	1	1	1	0	1	2	1	1	1	1	0	1	0	1	0	2	21	once	rather good	good	rather bad	rather much	rather positive	in between	rather useful	rather useful	rather useful	rather useful	rather useful	Backup Cards	Especially the pictures help you to fight for it	Maybe the settings, that you can also change the colors, or animals for the background: maybe you think, it this important, but people feeling lonely really get support from animals, more than from people	Being BackUp	I think all functions are important in their way, and as user, if you don't find that, you have the choice not to use them.	rather yes	yes	I just finished a hospitalization of 6 months. Started a treatment of a year now, which takes place every monday. I would use the app for the days that I cannot go to psychiatry	1	2
[truncated: 20 more columns]
